# Supplementary material for: Traditional Chinese medicine (TCM) enhances the therapeutic efficiency of a gemcitabine-loaded injectable hydrogel on postoperative breast cancer through modulating the microenvironment
Source: Royal Society of Chemistry journal article supplement (doi:10.1039/d4tb02776k), 2025-01-01

## **Traditional Chinese Medicine (TCM) enhances the therapeutic efficiency of Gemcitabine-loaded injectable hydrogel on postoperative breast cancer through modulating microenvironment**

Wenxu Wang <sup>a</sup>, Jixiang Yuan <sup>b</sup>, Yuying Zhu <sup>a</sup>, Ruixiang Li <sup>\*a</sup>, Jiange Zhang <sup>\*a</sup>











A

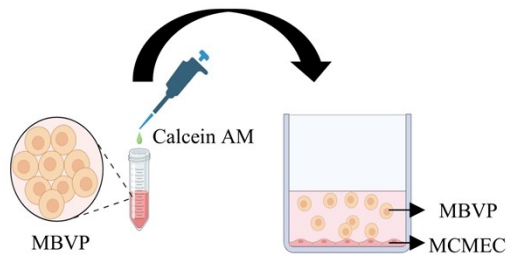

C

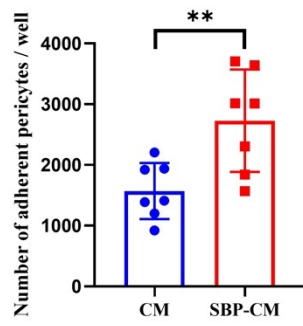

Supplement: d4tb02776k1.pdf [file d4tb02776k1.pdf]
